# Supplementary material
Source: MDPI journal article supplement (https://www.mdpi.com/1424-8220/11/2/1972)
Supplement: s1 [file s1]

*Correction*

## **Correction: Yoshie, T. *et al.* Optical Microcavity: Sensing down to Single Molecules and Atoms. *Sensors* 2011, 11, 1972-1991**

**Tomoyuki Yoshie \*, Lingling Tang and Shu-Yu Su**

Electrical and Computer Engineering, Fitzpatrick Institute for Photonics, Duke University, Durham, NC 27708, USA; E-Mails: lingling.tang@alumni.duke.edu (L.T.); shuyu.su@duke.edu (S.-Y.S.)

\* Author to whom correspondence should be addressed; E-Mail: yoshie@duke.edu;  
Tel.: +1-919-660-8448; Fax: +1-919-660-5293.

*Received: 21 June 2011 / Published: 22 June 2011*

---

The coefficient of the expression of Equation (6) was not properly written. Equation (6) should be corrected as

$$S \simeq \lambda \frac{\int_{env} n \varepsilon_0 |E_j|^2 d\vec{r}}{\int \varepsilon |E_j|^2 d\vec{r}}$$

in our paper published in *Sensors* in 2011 [1].

### **References**

1. Yoshie, T.; Tang, L.; Su, S.-Y. Optical Microcavity: Sensing down to Single Molecules and Atoms. *Sensors* **2011**, *11*, 1972-1991.

© 2011 by the authors; licensee MDPI, Basel, Switzerland. This article is an open access article distributed under the terms and conditions of the Creative Commons Attribution license (<http://creativecommons.org/licenses/by/3.0/>).
